# Supplementary material
Source: ML conference proceedings conference paper supplement (https://openaccess.thecvf.com/content/CVPR2022/html/Zhou_Multi-Granularity_Alignment_Domain_CVPR_2022_paper.html)
Supplement: Supplementary file 1 [file Zhou_Multi-Granularity_Alignment_Domain_CVPR_2022_supplemental.pdf]

# Multi-Granularity Alignment Domain Adaptation for Object Detection

## Supplementary Materials

### A. Omni-scale Gated Fusion for Faster-RCNN

In the Faster-RCNN detector [6], we use the backbone features with the stride 16 to collect the feature maps  $F$ . Different from FCOS [10], Faster-RCNN [6] is a two-stage object detection method. Therefore we directly use the RPN as the coarse detection heads to predict the candidate boxes  $\tilde{b}$ . To adapt to multi-scale objects  $\tilde{b}$ , we construct *low-resolution*, *mid-resolution* and *high-resolution* streams in the omni-scale gated fusion module (see Figure 1). Each stream contains convolutional layers with different kernels to extract features of objects, where the  $3 \times 3$  convolutional layer with stride 2 is used to expand the receptive field.

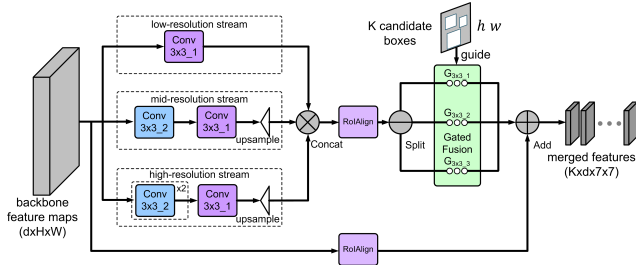

Figure 1. Omni-scale gated fusion module in the Faster-RCNN detector [6]. “3x3.2” in the blue rectangles denotes the  $3 \times 3$  convolutional layer with stride 2.  $d$  is the number of channels of feature maps.

Since the RPN in Faster-RCNN [6] only predicts sparse detections of the top  $K$  proposals, we first concatenate 3 feature maps and extract the corresponding RoI features  $F \in \mathbb{R}^{3 \times K \times d \times 7 \times 7}$  by the ROIAlign operation, where  $d$  denotes the dimension of the feature. Given the width  $w$  and height  $h$  of coarse detections, we can determine the corresponding gating mask from and merge them into  $M \in \mathbb{R}^{K \times d \times 7 \times 7}$ .

### B. Real-to-Artistic Adaptation Results

As presented in Table 1 and 2, we report the detection accuracy for each category on Clipart and Watercolor [4]. It can be seen that our method outperforms other state-of-the-art algorithms. Specifically, our method achieves the best performance on 7 out of 20 categories from PASCAL VOC

[2] to Clipart [4] and 3 out of 6 categories from PASCAL VOC [2] to Watercolor [4] respectively.

### C. Visual Adaptive Detection Results

We provide some adaptation object detection results in Figure 2 and 3. It indicates that our method can achieve state-of-the-art performance in various complex scenarios.

### References

- [1] Yanhua Cheng, Rui Cai, Zhiwei Li, Xin Zhao, and Kaiqi Huang. Locality-sensitive deconvolution networks with gated fusion for RGB-D indoor semantic segmentation. In *CVPR*, pages 1475–1483, 2017.
- [2] Mark Everingham, Luc Van Gool, Christopher K. I. Williams, John M. Winn, and Andrew Zisserman. The pascal visual object classes (VOC) challenge. *IJCV*, 88(2):303–338, 2010. 1
- [3] Zhenwei He and Lei Zhang. Domain adaptive object detection via asymmetric tri-way faster-rcnn. In *ECCV*, volume 12369, pages 309–324, 2020. 2
- [4] Naoto Inoue, Ryosuke Furuta, Toshihiko Yamasaki, and Kiyoharu Aizawa. Cross-domain weakly-supervised object detection through progressive domain adaptation. In *CVPR*, pages 5001–5009, 2018. 1
- [5] Congcong Li, Dawei Du, Libo Zhang, Longyin Wen, Tiejian Luo, Yanjun Wu, and Pengfei Zhu. Spatial attention pyramid network for unsupervised domain adaptation. In *ECCV*, volume 12358, pages 481–497, 2020. 2
- [6] Shaoqing Ren, Kaiming He, Ross B. Girshick, and Jian Sun. Faster R-CNN: towards real-time object detection with region proposal networks. *TPAMI*, 39(6):1137–1149, 2017. 1
- [7] Wenqi Ren, Lin Ma, Jiawei Zhang, Jinshan Pan, Xiaochun Cao, Wei Liu, and Ming-Hsuan Yang. Gated fusion network for single image dehazing. In *CVPR*, pages 3253–3261, 2018.
- [8] Kuniaki Saito, Yoshitaka Ushiku, Tatsuya Harada, and Kate Saenko. Strong-weak distribution alignment for adaptive object detection. In *CVPR*, pages 6956–6965, 2019. 2
- [9] Zhiqiang Shen, Harsh Maheshwari, Weichen Yao, and Marios Savvides. SCL: towards accurate domain adaptive object detection via gradient detach based stacked complementary losses. *CoRR*, abs/1911.02559, 2019. 2

| Method     | Detector    | Backbone   | aero        | bicycle     | bird        | boat        | bottle      | bus         | car         | cat         | chair       | cow         |
|------------|-------------|------------|-------------|-------------|-------------|-------------|-------------|-------------|-------------|-------------|-------------|-------------|
| Baseline   | Faster-RCNN | ResNet-101 | 35.6        | 52.5        | 24.3        | 23.0        | 20.0        | 43.9        | 32.8        | 10.7        | 30.6        | 11.7        |
| SW-DA [8]  | Faster-RCNN | ResNet-101 | 26.2        | 48.5        | 32.6        | 33.7        | 38.5        | 54.3        | 37.1        | 18.6        | 34.8        | 58.3        |
| SCL [9]    | Faster-RCNN | ResNet-101 | <b>44.7</b> | 50.0        | 33.6        | 27.4        | 42.2        | 55.6        | 38.3        | 19.2        | 37.9        | 69.0        |
| ATF [3]    | Faster-RCNN | ResNet-101 | 41.9        | 67.0        | 27.4        | <b>36.4</b> | 41.0        | 48.5        | 42.0        | 13.1        | 39.2        | <b>75.1</b> |
| PD [12]    | Faster-RCNN | ResNet-101 | 41.5        | 52.7        | <b>34.5</b> | 28.1        | <b>43.7</b> | 58.5        | 41.8        | 15.3        | 40.1        | 54.4        |
| SAPNet [5] | Faster-RCNN | ResNet-101 | 27.4        | <b>70.8</b> | 32.0        | 27.9        | 42.4        | 63.5        | 47.5        | 14.3        | <b>48.2</b> | 46.1        |
| Our        | Faster-RCNN | ResNet-101 | 35.5        | 64.6        | 27.8        | 34.5        | 41.6        | <b>66.4</b> | <b>49.8</b> | <b>26.8</b> | 43.6        | 56.7        |

|            |             |            | table       | dog         | horse       | bike        | person      | plant       | sheep       | sofa        | train       | tv          | mAP         |
|------------|-------------|------------|-------------|-------------|-------------|-------------|-------------|-------------|-------------|-------------|-------------|-------------|-------------|
| Baseline   | Faster-RCNN | ResNet-101 | 13.8        | 6.0         | 36.8        | 45.9        | 48.7        | 41.9        | 16.5        | 7.3         | 22.9        | 32.0        | 27.8        |
| SW-DA [8]  | Faster-RCNN | ResNet-101 | 17.0        | 12.5        | 33.8        | 65.5        | 61.6        | 52.0        | 9.3         | 24.9        | 54.1        | 49.1        | 38.1        |
| SCL [9]    | Faster-RCNN | ResNet-101 | 30.1        | 26.3        | 34.4        | 67.3        | 61.0        | 47.9        | 21.4        | 26.3        | 50.1        | 47.3        | 41.5        |
| ATF [3]    | Faster-RCNN | ResNet-101 | <b>33.4</b> | 7.9         | 41.2        | 56.2        | 61.4        | <b>50.6</b> | <b>42.0</b> | 25.0        | 53.1        | 39.1        | 42.1        |
| PD [12]    | Faster-RCNN | ResNet-101 | 26.7        | <b>28.5</b> | 37.7        | 75.4        | 63.7        | 48.7        | 16.5        | <b>30.8</b> | 54.5        | 48.7        | 42.1        |
| SAPNet [5] | Faster-RCNN | ResNet-101 | 31.8        | 17.9        | <b>43.8</b> | 68.0        | 68.1        | 49.0        | 18.7        | 20.4        | 55.8        | 51.3        | 42.2        |
| ours       | Faster-RCNN | ResNet-101 | 24.3        | 20.9        | 43.2        | <b>84.3</b> | <b>74.2</b> | 41.1        | 17.4        | 27.6        | <b>56.5</b> | <b>57.6</b> | <b>44.8</b> |

Table 1. Real-to-Artistic adaptation detection results from PASCAL VOC to Clipart.

| Method     | Detector    | Backbone   | bike        | bird        | car         | cat         | dog         | person      | mAP         |
|------------|-------------|------------|-------------|-------------|-------------|-------------|-------------|-------------|-------------|
| Baseline   | Faster-RCNN | ResNet-101 | 68.8        | 46.8        | 37.2        | 32.7        | 21.3        | 60.7        | 44.6        |
| SW-DA [8]  | Faster-RCNN | ResNet-101 | 82.3        | 55.9        | 46.5        | 32.7        | 35.5        | 66.7        | 53.3        |
| SCL [9]    | Faster-RCNN | ResNet-101 | 82.2        | 55.1        | 51.8        | 39.6        | 38.4        | 64.0        | 55.2        |
| ATF [3]    | Faster-RCNN | ResNet-101 | 78.8        | <b>59.9</b> | 47.9        | 41.0        | 34.8        | 66.9        | 54.9        |
| PD [12]    | Faster-RCNN | ResNet-101 | <b>95.8</b> | 54.3        | 48.3        | <b>42.4</b> | 35.1        | 65.8        | 56.9        |
| SAPNet [5] | Faster-RCNN | ResNet-101 | 81.1        | 51.1        | 53.6        | 34.3        | 39.8        | 71.3        | 55.2        |
| ours       | Faster-RCNN | ResNet-101 | 87.6        | 49.9        | <b>56.9</b> | 37.4        | <b>44.6</b> | <b>72.5</b> | <b>58.1</b> |

Table 2. Real-to-Artistic adaptation detection results from PASCAL VOC to Watercolor.

- [10] Zhi Tian, Chunhua Shen, Hao Chen, and Tong He. FCOS: fully convolutional one-stage object detection. In *ICCV*, pages 9626–9635, 2019. 1
- [11] Bairui Wang, Lin Ma, Wei Zhang, Wenhao Jiang, Jingwen Wang, and Wei Liu. Controllable video captioning with POS sequence guidance based on gated fusion network. In *ICCV*, pages 2641–2650, 2019.
- [12] Aming Wu, Yahong Han, Linchao Zhu, and Yi Yang. Instance-invariant domain adaptive object detection via progressive disentanglement. *TPAMI*, 2021. 2
- [13] Minghao Xu, Hang Wang, Bingbing Ni, Qi Tian, and Wenjun Zhang. Cross-domain detection via graph-induced prototype alignment. In *CVPR*, pages 12352–12361, 2020.

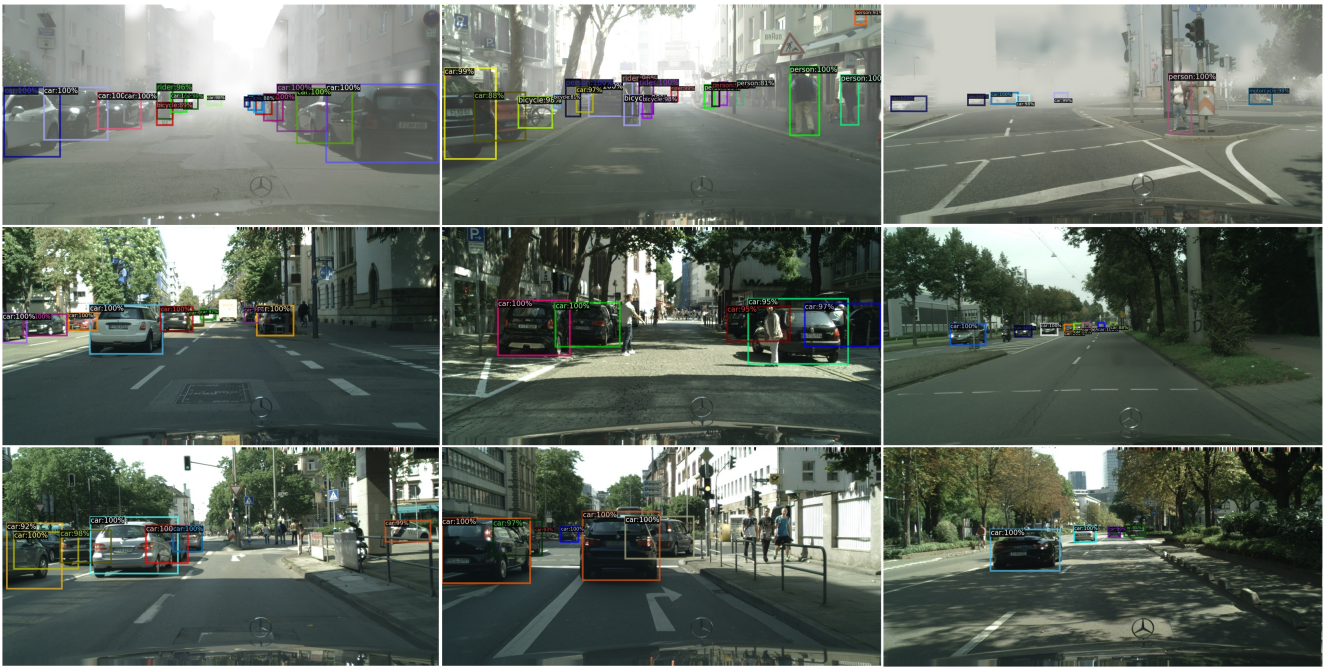

Figure 2. Weather adaptation and synthetic-to-real adaptation object detection results. From top to down: Cityscapes→FoggyCityscapes, Sim10k→Cityscapes and KITTI→Cityscapes.



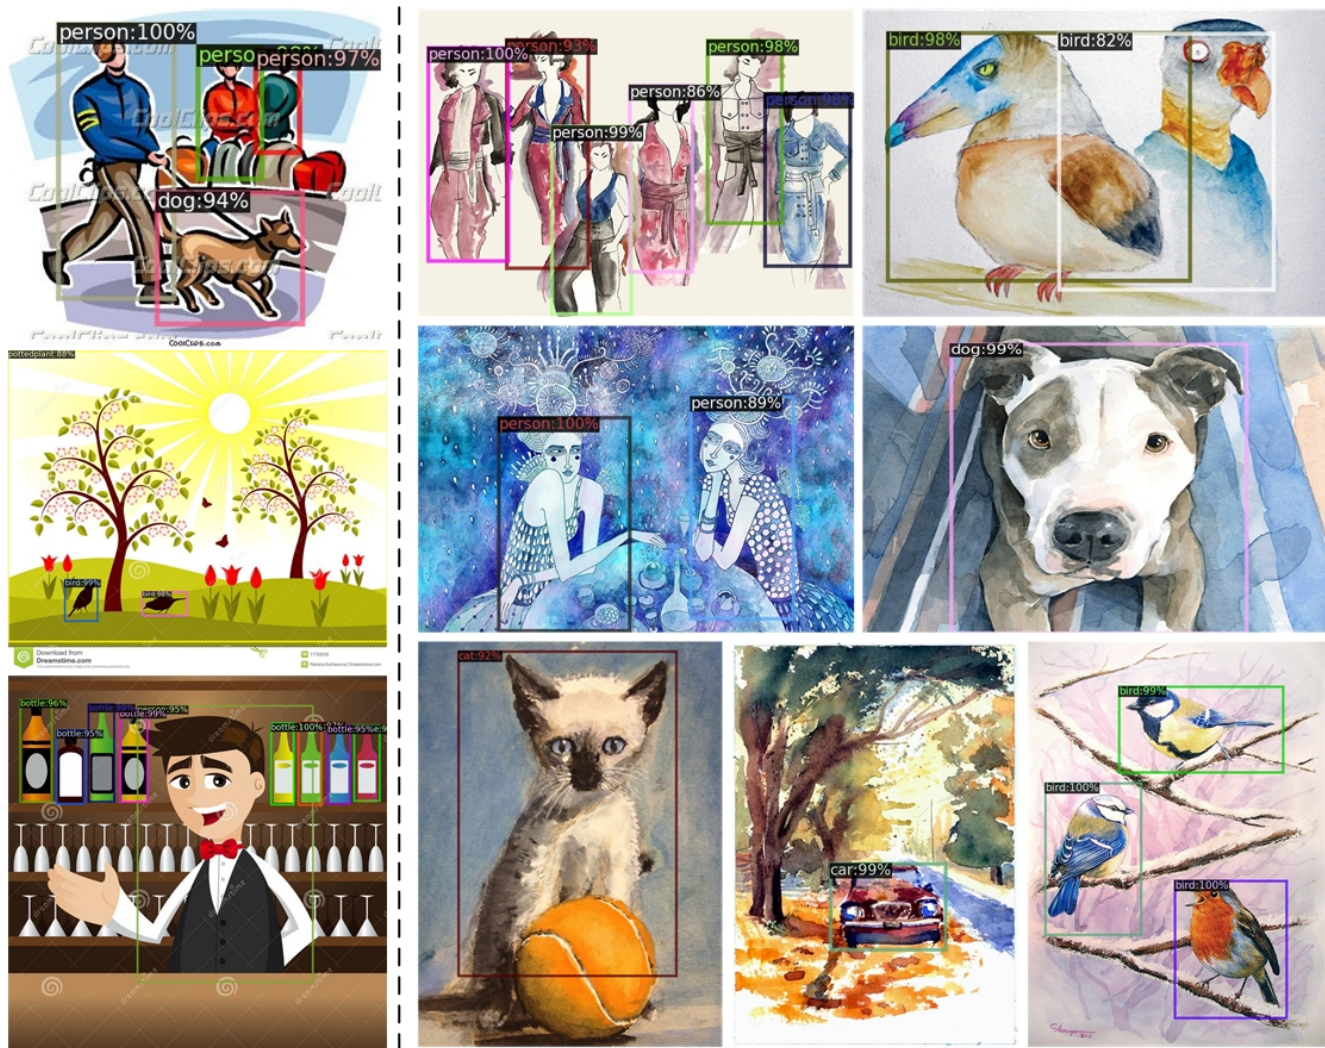

Figure 3. Real-to-Artistic adaptation object detection results. From left to right: PASCAL VOC→Clipart and PASCAL VOC→WaterColor.
